# Supplementary material for: Towards Optimized Photoluminescent Copper(I) Phenanthroline-Functionalized Complexes: Control of the Photophysics by Symmetry-Breaking and Spin–Orbit Coupling
Source: MDPI journal article supplement (doi:10.3390/ma15155222), 2022-07-28
Supplement: s1 [file s1]

## Supplementary Information

# Towards optimized photoluminescent Copper(I) phenanthroline-functionalized complexes: Control of the photophysics by symmetry breaking and spin-orbit coupling

Christophe Gourlaouen <sup>1,\*</sup> and Chantal Daniel<sup>1</sup>

Affiliation 1: Laboratoire de Chimie Quantique Institut de Chimie UMR 7177 CNRS-  
Université de Strasbourg,

4, Rue Blaise Pascal CS 90032, F-67081 Strasbourg Cedex, France.

\* Co: gourlaouen@unistra.fr

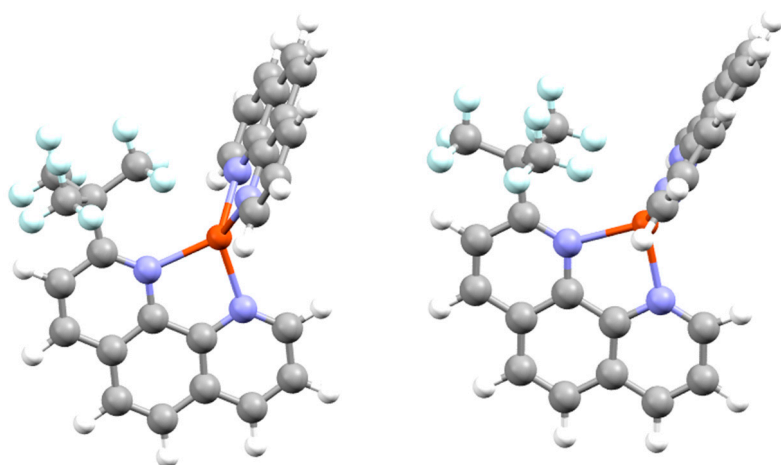

**Figure S1:** In (left) and out (right) orientations of a tBu group on a simplified complex holding only one tBu.

| Structure                                                      | DEVVIJ <sup>1</sup> | DEVVIJ | BUFSOM <sup>2</sup> | BUZRIZ <sup>3</sup> | GATYUX <sup>4</sup> | MAHBOP <sup>5</sup> | NADGAA <sup>6</sup> | ELEZUS <sup>7</sup> | IBISOC <sup>8</sup> | <b>1<sub>H</sub></b> |
|----------------------------------------------------------------|---------------------|--------|---------------------|---------------------|---------------------|---------------------|---------------------|---------------------|---------------------|----------------------|
| Cu-N                                                           | 2.047               | 2.035  | 1.996               | 2.046               | 2.026               | 2.009               | 2.033               | 2.036               | 2.082               | 2.068                |
| Cu-N                                                           | 2.059               | 2.054  | 1.996               | 2.040               | 2.058               | 2.069               | 2.061               | 2.015               | 2.048               | 2.068                |
| Cu-N                                                           | 2.047               | 2.035  | 1.996               | 2.027               | 2.067               | 2.081               | 2.034               | 2.015               | 2.055               | 2.068                |
| Cu-N                                                           | 2.059               | 2.054  | 1.996               | 2.055               | 2.009               | 1.998               | 2.068               | 2.036               | 2.079               | 2.068                |
| Cu-X <sub>1</sub>                                              | 3.982               | 3.972  | 3.924               | 4.000               | 3.966               | 3.947               | 3.975               | 3.943               | 4.003               | 4.002                |
| Cu-X <sub>2</sub>                                              | 3.982               | 3.972  | 3.924               | 3.990               | 3.960               | 3.959               | 3.969               | 3.943               | 4.002               | 4.002                |
| X <sub>1</sub> -Cu-X <sub>2</sub>                              | 175.8               | 174.6  | 180.0               | 179.0               | 163.6               | 144.8               | 178.2               | 171.1               | 178.7               | 180.0                |
| C <sub>1</sub> -X <sub>1</sub> -X <sub>2</sub> -C <sub>2</sub> | 58.1                | 71.0   | 33.9                | 87.6                | 90.0                | 67.2                | 47.6                | 58.9                | 42.8                | 90.0                 |

**Table S1:** Experimental (from CSD reference) and computed (GAUSSIAN) geometrical parameters for complex **1<sub>H</sub>**. Distances are in Angstroms, angles and dihedral angles in degrees.

| Structure                                                      | DMPRCU <sup>9</sup> | DMPRCU | DMPNCU <sup>10</sup> | ABAFAN <sup>11</sup> | HEVPAA <sup>12</sup> | IPICUF <sup>13</sup> | NILHUL <sup>14</sup> | 1 <sub>Me</sub> |
|----------------------------------------------------------------|---------------------|--------|----------------------|----------------------|----------------------|----------------------|----------------------|-----------------|
| Cu-N                                                           | 2.061               | 2.058  | 2.008                | 2.012                | 1.932                | 2.013                | 2.022                | 2.060           |
| Cu-N                                                           | 2.043               | 2.084  | 2.140                | 2.032                | 2.011                | 2.022                | 2.025                | 2.060           |
| Cu-N                                                           | 2.043               | 2.058  | 2.062                | 2.020                | 2.026                | 1.997                | 2.022                | 2.060           |
| Cu-N                                                           | 2.061               | 2.084  | 2.064                | 2.027                | 2.011                | 2.045                | 2.025                | 2.060           |
| Cu-X <sub>1</sub>                                              | 3.980               | 3.995  | 3.995                | 3.952                | 3.921                | 3.942                | 3.945                | 3.994           |
| Cu-X <sub>2</sub>                                              | 3.980               | 3.995  | 3.960                | 3.948                | 3.939                | 3.940                | 3.945                | 3.994           |
| X <sub>1</sub> -Cu-X <sub>2</sub>                              | 171.4               | 171.8  | 151.6                | 170.5                | 171.6                | 165.0                | 176.9                | 180.0           |
| C <sub>1</sub> -X <sub>1</sub> -X <sub>2</sub> -C <sub>2</sub> | 67.6                | 68.3   | 78.3                 | 74.7                 | 87.0                 | 89.9                 | 81.0                 | 90.0            |

**Table S2:** Experimental (from CSD reference) and computed (GAUSSIAN) geometrical parameters for complex **1<sub>Me</sub>**. Distances are in Angstroms, angles and dihedral angles in degrees.

| Structure                                                      | $\alpha$ | $\beta$ | $\gamma$ | $\delta$ | $\zeta$ | $\epsilon$ | 2     | 3     |
|----------------------------------------------------------------|----------|---------|----------|----------|---------|------------|-------|-------|
| Cu-N                                                           | 2.075    | 2.141   | 2.113    | 2.129    | 2.144   | 2.144      | 2.155 | 2.035 |
| Cu-N                                                           | 2.075    | 2.141   | 2.133    | 2.161    | 2.144   | 2.146      | 2.155 | 2.290 |
| Cu-N                                                           | 2.075    | 2.142   | 2.120    | 2.129    | 2.147   | 2.181      | 2.169 | 2.114 |
| Cu-N                                                           | 2.075    | 2.142   | 2.121    | 2.161    | 2.147   | 2.114      | 2.169 | 2.114 |
| Cu-X <sub>1</sub>                                              | 3.931    | 4.032   | 3.998    | 4.033    | 4.037   | 4.036      | 4.081 | 4.095 |
| Cu-X <sub>2</sub>                                              | 3.931    | 4.035   | 4.005    | 4.033    | 4.041   | 4.042      | 4.083 | 4.028 |
| X <sub>1</sub> -Cu-X <sub>2</sub>                              | 180.0    | 180.0   | 172.4    | 172.4    | 180.0   | 178.2      | 180.0 | 176.4 |
| C <sub>1</sub> -X <sub>1</sub> -X <sub>2</sub> -C <sub>2</sub> | 90.0     | 84.7    | 89.1     | 88.8     | 90.0    | 88.4       | 90.0  | 90.0  |

**Table S3:** Computed (GAUSSIAN) geometrical parameters for complexes **1<sub>IBu</sub>**, **2** and **3** in the ground state. Distances are in Angstroms, angles and dihedral angles in degrees.

| Structure                                                      | EDOFJ <sup>15</sup> |          |          |         |            |
|----------------------------------------------------------------|---------------------|----------|----------|---------|------------|
|                                                                | $\delta$            | $\delta$ | $\delta$ | $\zeta$ | $\epsilon$ |
| Cu-N                                                           | 2.103               | 2.076    | 2.081    | 2.105   | 2.072      |
| Cu-N                                                           | 2.120               | 2.139    | 2.105    | 2.108   | 2.145      |
| Cu-N                                                           | 2.096               | 2.096    | 2.092    | 2.104   | 2.148      |
| Cu-N                                                           | 2.129               | 2.115    | 2.114    | 2.111   | 2.079      |
| Cu-X <sub>1</sub>                                              | 3.992               | 3.984    | 3.976    | 4.005   | 4.002      |
| Cu-X <sub>2</sub>                                              | 3.999               | 3.997    | 3.980    | 3.990   | 4.000      |
| X <sub>1</sub> -Cu-X <sub>2</sub>                              | 174.6               | 170.2    | 176.6    | 177.0   | 176.0      |
| C <sub>1</sub> -X <sub>1</sub> -X <sub>2</sub> -C <sub>2</sub> | 81.2                | 89.6     | 88.5     | 86.6    | 85.7       |

**Table S4:** Experimental geometrical parameters for complex **1<sub>IBu</sub>**. Distances are in Angstroms, angles and dihedral angles in degrees.

| Structure                                                      | <b>1<sub>H</sub></b> | <b>1<sub>H</sub> (TS1)</b> | <b>1<sub>Me</sub></b> | <b>1<sub>Me</sub> (TS1)</b> | <b>1<sub>Me</sub> (TS2)</b> | <b>1<sub>tBu</sub></b> | <b>1<sub>tBu</sub> (TS2)</b> | <b>2</b> | <b>3</b> |
|----------------------------------------------------------------|----------------------|----------------------------|-----------------------|-----------------------------|-----------------------------|------------------------|------------------------------|----------|----------|
| Cu-N                                                           | 1.993                | 1.937                      | 1.969                 | 1.937                       | 1.994                       | 1.987                  | 2.034                        | 2.000    | 1.975    |
| Cu-N                                                           | 1.993                | 1.944                      | 1.969                 | 1.939                       | 1.994                       | 2.000                  | 2.073                        | 2.000    | 1.975    |
| Cu-N                                                           | 1.993                | 2.118                      | 2.027                 | 2.109                       | 1.994                       | 2.129                  | 2.034                        | 2.219    | 2.093    |
| Cu-N                                                           | 1.993                | 2.118                      | 2.027                 | 2.109                       | 1.994                       | 2.231                  | 2.073                        | 2.219    | 2.345    |
| Cu-X <sub>1</sub>                                              | 3.934                | 3.881                      | 3.906                 | 3.879                       | 3.927                       | 3.897                  | 3.948                        | 3.914    | 3.900    |
| Cu-X <sub>2</sub>                                              | 3.934                | 4.063                      | 3.955                 | 4.050                       | 3.927                       | 4.084                  | 3.948                        | 4.164    | 4.167    |
| X <sub>1</sub> -Cu-X <sub>2</sub>                              | 180.0                | 161.1                      | 180.0                 | 179.1                       | 180.0                       | 168.8                  | 176.1                        | 180.0    | 176.7    |
| C <sub>1</sub> -X <sub>1</sub> -X <sub>2</sub> -C <sub>2</sub> | 41.5                 | 90.0                       | 65.0                  | 90.0                        | 62.8                        | 86.3                   | 82.9                         | 90.0     | 90.0     |
| ΔG                                                             | 0.0                  | 12.9                       | 0.0                   | 4.4                         | -0.4                        | 0.0                    | 2.4                          |          |          |

**Table S5:** Computed (GAUSSIAN) geometrical parameters for complexes in the triplet state. The values are given for conformer  $\delta$  for **1<sub>tBu</sub>**. Distances are in Angstroms, angles and dihedral angles in degrees and energies in kcal mol<sup>-1</sup>.

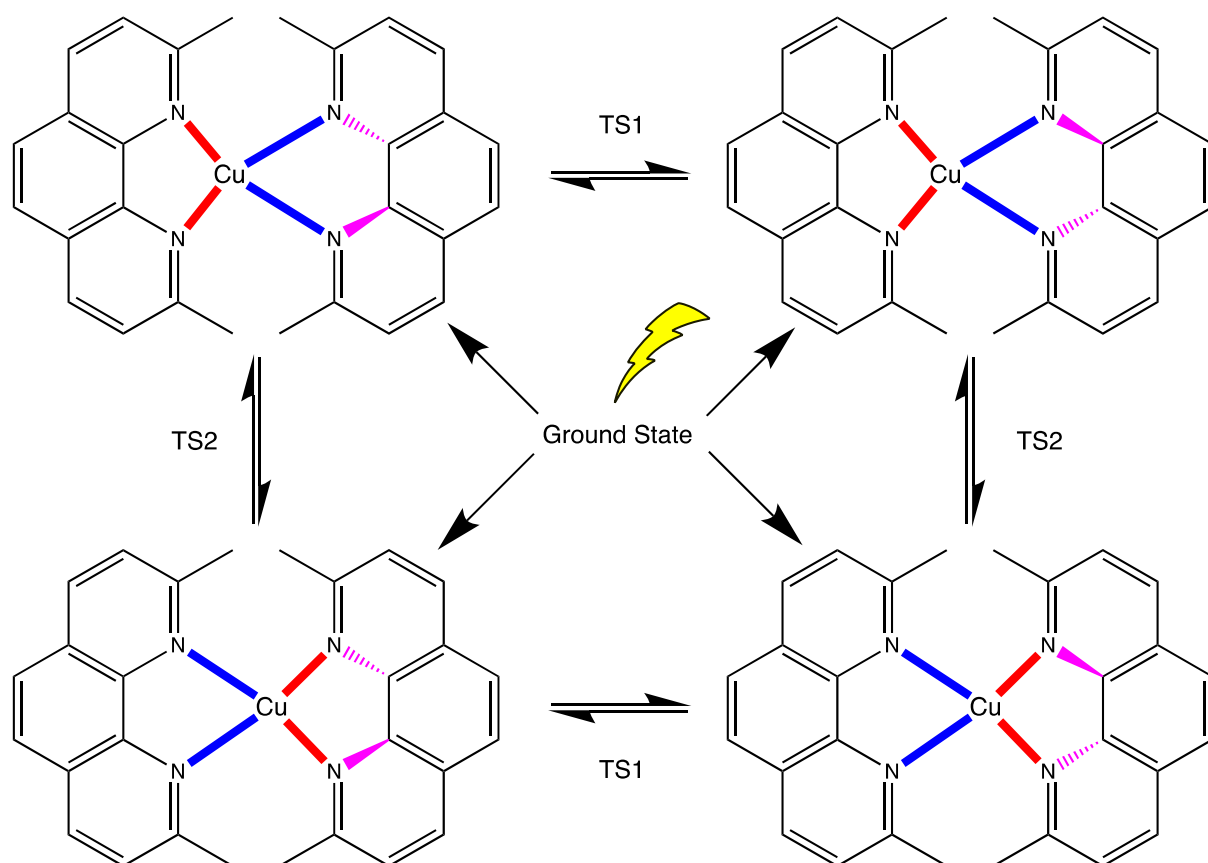

**Scheme S1:** Representation of the four possible Triplet minima after irradiation of **1<sub>Me</sub>** complex. In bold blue are the long Cu-N distance, in bold red the short Cu-N distance and in purple the indication of how the phen ligands is out of plane.

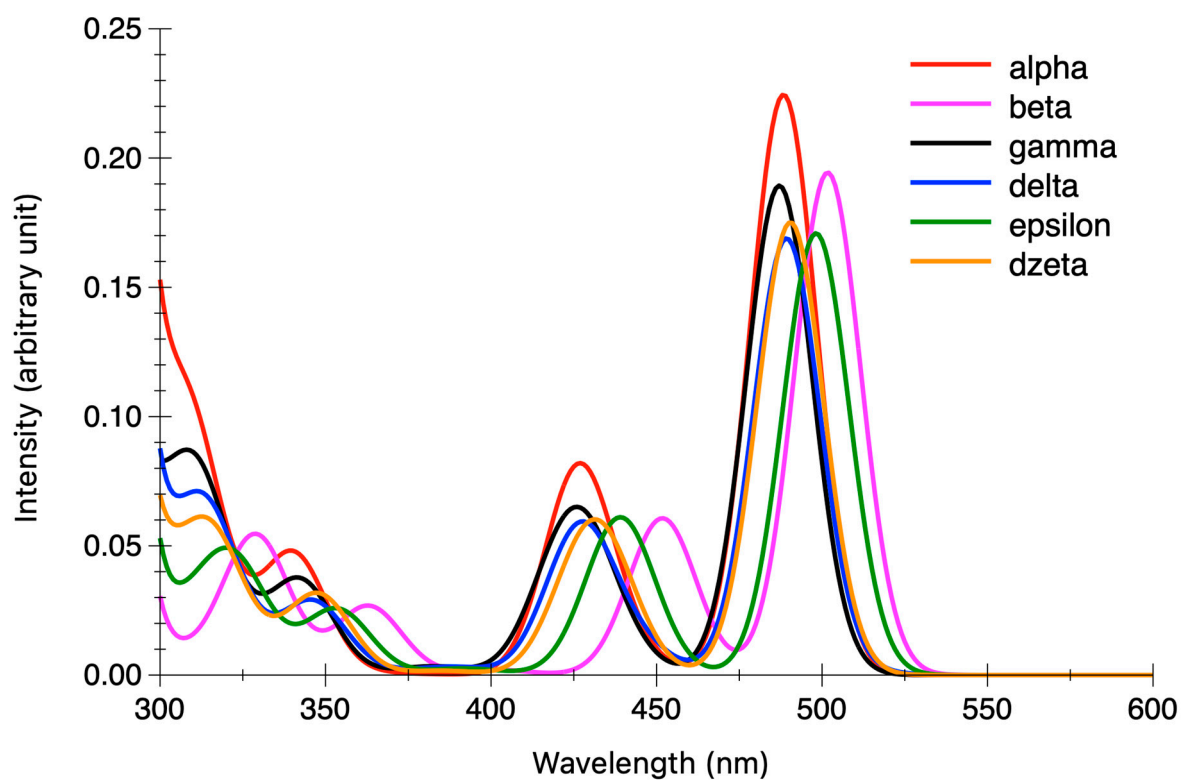

Figure S2: ADF computed Absorption spectra for the different conformers of **1<sub>tBu</sub>**.

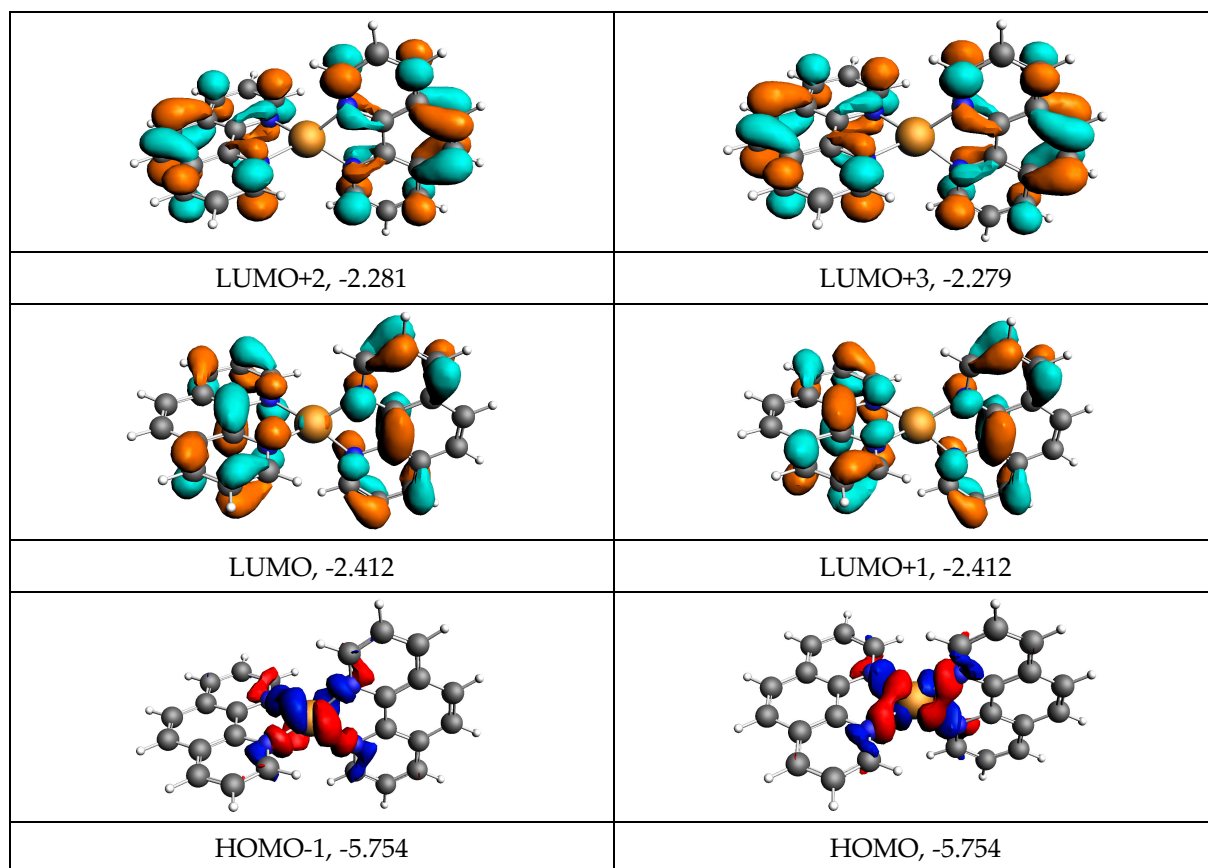

Figure S3: Frontier orbitals of **1<sub>H</sub>** and energies in eV.

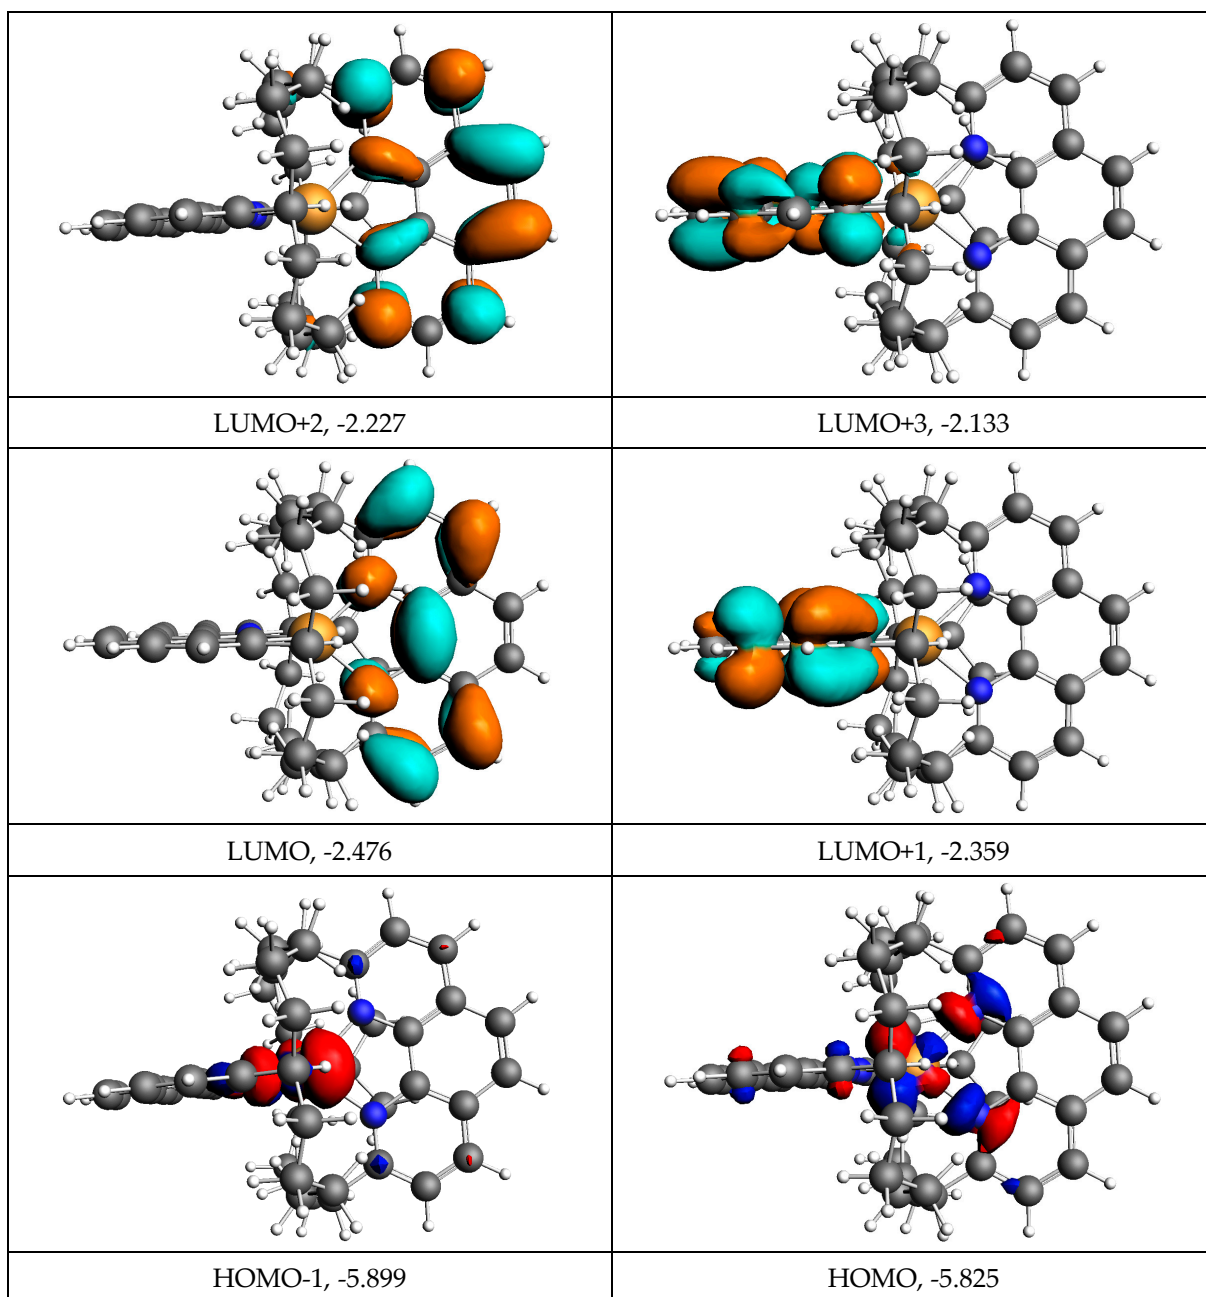

**Figure S4:** Frontier orbitals of **3** and energies in eV.

|                   | S0 (D2d) | S1    | T1    | T2    |
|-------------------|----------|-------|-------|-------|
| Cu-N              | 2.062    | 2.004 | 1.991 | 2.028 |
|                   | 2.062    | 2.004 | 1.991 | 2.028 |
|                   | 2.062    | 2.064 | 2.035 | 2.028 |
|                   | 2.062    | 2.064 | 2.035 | 2.028 |
| Cu-X <sub>1</sub> | 3.989    | 3.933 | 3.931 | 3.957 |
| Cu-X <sub>2</sub> | 3.989    | 3.993 | 3.962 | 3.957 |

|                                                                |       |       |       |       |
|----------------------------------------------------------------|-------|-------|-------|-------|
| X <sub>1</sub> -Cu-X <sub>2</sub>                              | 180.0 | 179.9 | 179.9 | 180.0 |
| C <sub>1</sub> -X <sub>1</sub> -X <sub>2</sub> -C <sub>2</sub> | 90.0  | 39.9  | 39.9  | 40.4  |

**Table S6:** Selected nuclear coordinates at the optimized ground state and low-lying excited states for **1<sub>H</sub>** computed with ADF. Distances are in Angstroms, angles and dihedral angles in degrees.

|                                                                | S0 (D2d) | S1    | T1    | T2    |
|----------------------------------------------------------------|----------|-------|-------|-------|
| Cu-N                                                           | 2.056    | 1.985 | 1.990 | 2.019 |
|                                                                | 2.056    | 1.985 | 1.990 | 2.019 |
|                                                                | 2.056    | 2.102 | 2.047 | 2.020 |
|                                                                | 2.056    | 2.102 | 2.047 | 2.020 |
| Cu-X <sub>1</sub>                                              | 3.980    | 3.900 | 3.922 | 3.940 |
| Cu-X <sub>2</sub>                                              | 3.980    | 4.027 | 3.965 | 3.940 |
| X <sub>1</sub> -Cu-X <sub>2</sub>                              | 180.0    | 180.0 | 180.0 | 180.0 |
| C <sub>1</sub> -X <sub>1</sub> -X <sub>2</sub> -C <sub>2</sub> | 90.0     | 68.2  | 65.0  | 68.1  |

**Table S7:** Selected nuclear coordinates at the optimized ground state and low-lying excited states for **1<sub>Me</sub>** computed with ADF. Distances are in Angstroms, angles and dihedral angles in degrees.

|                                                                | S0 (C2) | S1    | T1    | T2    |
|----------------------------------------------------------------|---------|-------|-------|-------|
| Cu-N                                                           | 2.118   | 2.005 | 1.996 | 2.035 |
|                                                                | 2.153   | 2.022 | 2.021 | 2.158 |
|                                                                | 2.118   | 2.171 | 2.168 | 2.032 |
|                                                                | 2.153   | 2.306 | 2.298 | 2.161 |
| Cu-X <sub>1</sub>                                              | 4.017   | 3.898 | 3.900 | 3.987 |
| Cu-X <sub>2</sub>                                              | 4.017   | 4.142 | 4.134 | 3.988 |
| X <sub>1</sub> -Cu-X <sub>2</sub>                              | 172.5   | 167.9 | 167.6 | 166.6 |
| C <sub>1</sub> -X <sub>1</sub> -X <sub>2</sub> -C <sub>2</sub> | 89.1    | 88.1  | 86.0  | 83.0  |

**Table S8:** Selected nuclear coordinates at the optimized ground state and low-lying excited states for **1<sub>tBu</sub>** for experimental  $\delta$  structure computed with ADF. Distances are in Angstroms, angles and dihedral angles in degrees.

| Structure                                                      | <b>1<sub>H</sub></b> | <b>1<sub>Me</sub></b> | <b>1<sub>tBu</sub> (<math>\alpha</math>)</b> | <b>1<sub>tBu</sub> (<math>\beta</math>)</b> | <b>1<sub>tBu</sub> (<math>\gamma</math>)</b> | <b>1<sub>tBu</sub> (<math>\delta</math>)</b> | <b>1<sub>tBu</sub> (<math>\epsilon</math>)</b> | <b>1<sub>tBu</sub> (<math>\zeta</math>)</b> | <b>2</b> | <b>3</b> |
|----------------------------------------------------------------|----------------------|-----------------------|----------------------------------------------|---------------------------------------------|----------------------------------------------|----------------------------------------------|------------------------------------------------|---------------------------------------------|----------|----------|
| Cu-N                                                           | 2.062                | 2.056                 | 2.064                                        | 2.129                                       | 2.107                                        | 2.118                                        | 2.134                                          | 2.136                                       | 2.156    | 2.102    |
| Cu-N                                                           | 2.062                | 2.056                 | 2.074                                        | 2.135                                       | 2.115                                        | 2.153                                        | 2.137                                          | 2.141                                       | 2.156    | 2.116    |
| Cu-N                                                           | 2.062                | 2.056                 | 2.064                                        | 2.129                                       | 2.107                                        | 2.118                                        | 2.182                                          | 2.132                                       | 2.140    | 2.020    |
| Cu-N                                                           | 2.062                | 2.056                 | 2.074                                        | 2.135                                       | 2.118                                        | 2.153                                        | 2.102                                          | 2.137                                       | 2.140    | 2.299    |
| Cu-X <sub>1</sub>                                              | 3.989                | 3.980                 | 3.919                                        | 4.019                                       | 3.981                                        | 4.017                                        | 4.023                                          | 4.025                                       | 4.061    | 4.018    |
| Cu-X <sub>2</sub>                                              | 3.989                | 3.980                 | 3.919                                        | 4.019                                       | 3.988                                        | 4.017                                        | 4.030                                          | 4.021                                       | 4.059    | 4.083    |
| X <sub>1</sub> -Cu-X <sub>2</sub>                              | 180.0                | 180.0                 | 179.7                                        | 179.7                                       | 173.1                                        | 172.5                                        | 179.4                                          | 179.9                                       | 180.0    | 174.4    |
| C <sub>1</sub> -X <sub>1</sub> -X <sub>2</sub> -C <sub>2</sub> | 90.0                 | 90.0                  | 89.6                                         | 89.3                                        | 89.5                                         | 89.1                                         | 89.6                                           | 89.3                                        | 90.0     | 89.7     |

**Table S9:** Computed ground state (ADF) geometrical parameters. Distances are in Angstroms, angles and dihedral angles in degrees.

| State | Conformer                                                      | $\alpha$ | $\beta$ | $\gamma$ | $\gamma^1$ | $\delta$ | $\epsilon$ | $\epsilon^1$ | $\zeta$ | $\zeta^1$ |
|-------|----------------------------------------------------------------|----------|---------|----------|------------|----------|------------|--------------|---------|-----------|
| S1    | Cu-N                                                           | 1.980    | 2.022   | 1.996    | 2.189      | 2.005    | 2.016      | 2.215        | 2.018   | 2.223     |
|       | Cu-N                                                           | 1.980    | 2.022   | 2.000    | 2.209      | 2.022    | 2.018      | 2.257        | 2.018   | 2.223     |
|       | Cu-N                                                           | 2.139    | 2.239   | 2.145    | 2.002      | 2.171    | 2.229      | 2.017        | 2.222   | 2.01      |
|       | Cu-N                                                           | 2.139    | 2.239   | 2.281    | 2.014      | 2.306    | 2.255      | 2.018        | 2.222   | 2.01      |
|       | Cu-X <sub>1</sub>                                              | 3.839    | 3.908   | 3.873    | 4.082      | 3.898    | 3.901      | 4.139        | 3.908   | 4.126     |
|       | Cu-X <sub>2</sub>                                              | 3.998    | 4.144   | 4.105    | 3.887      | 4.142    | 4.149      | 3.906        | 4.121   | 3.892     |
|       | X <sub>1</sub> -Cu-X <sub>2</sub>                              | 180.0    | 180.0   | 169.4    | 170.6      | 167.9    | 176.3      | 179.1        | 180.0   | 180.0     |
|       | C <sub>1</sub> -X <sub>1</sub> -X <sub>2</sub> -C <sub>2</sub> | 89.0     | 88.8    | 88.7     | 89.4       | 88.1     | 90.0       | 89.7         | 89.9    | 89.8      |
| T1    | Cu-N                                                           | 1.985    | 2.015   | 1.989    | 2.165      | 1.996    | 2.008      | 2.210        | 2.010   | 2.220     |
|       | Cu-N                                                           | 1.985    | 2.015   | 1.993    | 2.225      | 2.021    | 2.009      | 2.259        | 2.010   | 2.220     |
|       | Cu-N                                                           | 2.108    | 2.237   | 2.154    | 2.012      | 2.168    | 2.221      | 2.008        | 2.220   | 2.003     |
|       | Cu-N                                                           | 2.108    | 2.237   | 2.256    | 1.990      | 2.298    | 2.263      | 2.011        | 2.220   | 2.003     |
|       | Cu-X <sub>1</sub>                                              | 3.853    | 3.908   | 3.873    | 4.077      | 3.900    | 3.899      | 4.136        | 3.907   | 4.122     |
|       | Cu-X <sub>2</sub>                                              | 3.963    | 4.140   | 4.097    | 3.888      | 4.134    | 4.142      | 3.904        | 4.117   | 3.891     |
|       | X <sub>1</sub> -Cu-X <sub>2</sub>                              | 180.0    | 180.0   | 170.4    | 170.1      | 167.6    | 175.8      | 179.2        | 180.0   | 180.0     |
|       | C <sub>1</sub> -X <sub>1</sub> -X <sub>2</sub> -C <sub>2</sub> | 87.1     | 89.0    | 89.4     | 88.4       | 86.0     | 89.1       | 89.6         | 89.9    | 89.9      |

**Table S10:** Selected nuclear coordinates at the low-lying excited states for **1tBu** computed with ADF. Distances are in Angstroms, and angles in degrees.

| State | Conformer         | $\alpha$              | $\beta$               | $\gamma$              | $\gamma^1$            | $\delta$               | $\epsilon$            | $\epsilon^1$          | $\zeta$                | $\zeta^1$              |
|-------|-------------------|-----------------------|-----------------------|-----------------------|-----------------------|------------------------|-----------------------|-----------------------|------------------------|------------------------|
|       | GS Symmetry       | D <sub>2d</sub>       | D <sub>2d</sub>       | C <sub>1</sub>        | C <sub>1</sub>        | C <sub>2</sub>         | C <sub>1</sub>        | C <sub>1</sub>        | C <sub>2v</sub>        | C <sub>2v</sub>        |
|       | S1 Symmetry       | C <sub>2</sub>        | C <sub>2</sub>        | C <sub>1</sub>        | C <sub>1</sub>        | C <sub>1</sub>         | C <sub>1</sub>        | C <sub>1</sub>        | C <sub>2</sub>         | C <sub>2</sub>         |
| S1    | E <sub>def</sub>  | 0.542                 | 0.497                 | 0.279                 | 0.287                 | 0.286                  | 0.376                 | 0.374                 | 0.249                  | 0.244                  |
|       | E <sub>em</sub>   | 1.944                 | 1.779                 | 1.870                 | 1.897                 | 1.813                  | 1.801                 | 1.826                 | 1.884                  | 1.863                  |
|       | E <sub>stab</sub> | 2.486                 | 2.275                 | 2.149                 | 2.184                 | 2.099                  | 2.177                 | 2.200                 | 2.133                  | 2.106                  |
|       | $\Delta E$        | 0.387                 | 0.176                 | 0.050                 | 0.085                 | 0.000                  | 0.078                 | 0.101                 | 0.033                  | 0.007                  |
|       | $\lambda_{em}$    | 638                   | 697                   | 663                   | 653                   | 684                    | 688                   | 679                   | 658                    | 666                    |
|       | f <sub>osc</sub>  | 1.06 10 <sup>-5</sup> | 1.57 10 <sup>-6</sup> | 1.53 10 <sup>-5</sup> | 1.16 10 <sup>-4</sup> | 2.54 10 <sup>-4</sup>  | 2.53 10 <sup>-5</sup> | 2.20 10 <sup>-7</sup> | 1.59 10 <sup>-8</sup>  | 1.07 10 <sup>-7</sup>  |
|       | T1 Symmetry       | C <sub>2</sub>        | C <sub>2</sub>        | C <sub>1</sub>        | C <sub>1</sub>        | C <sub>1</sub>         | C <sub>1</sub>        | C <sub>1</sub>        | C <sub>2</sub>         | C <sub>2</sub>         |
| T1    | E <sub>def</sub>  | 0.585                 | 0.513                 | 0.295                 | 0.314                 | 0.341                  | 0.397                 | 0.397                 | 0.270                  | 0.263                  |
|       | E <sub>em</sub>   | 1.745                 | 1.633                 | 1.715                 | 1.731                 | 1.656                  | 1.648                 | 1.671                 | 1.726                  | 1.707                  |
|       | E <sub>stab</sub> | 2.331                 | 2.146                 | 2.011                 | 2.044                 | 1.997                  | 2.046                 | 2.068                 | 1.997                  | 1.970                  |
|       | $\Delta E$        | 0.360                 | 0.175                 | 0.040                 | 0.074                 | 0.027                  | 0.075                 | 0.098                 | 0.026                  | 0.000                  |
|       | $\lambda_{em}$    | 710                   | 759                   | 723                   | 716                   | 749                    | 752                   | 742                   | 718                    | 726                    |
|       | $\Delta E_{ST}$   | 0.188                 | 0.133                 | 0.144                 | 0.147                 | 0.143                  | 0.138                 | 0.136                 | 0.140                  | 0.141                  |
|       | SOC S1-T1         | 73.0                  | 6.0                   | 3.6                   | 19.7                  | 20.1                   | 8.3                   | 0.64                  | 0.0                    | 1.0                    |
|       |                   | 3.04 10 <sup>-6</sup> | 2.10 10 <sup>-9</sup> | 7.05 10 <sup>-7</sup> | 7.42 10 <sup>-6</sup> | 6.85 10 <sup>-6</sup>  | 4.25 10 <sup>-6</sup> | 3.93 10 <sup>-6</sup> | 1.09 10 <sup>-13</sup> | 2.92 10 <sup>-10</sup> |
|       | f <sub>osc</sub>  | 8.97 10 <sup>-6</sup> | 6.86 10 <sup>-6</sup> | 4.69 10 <sup>-5</sup> | 1.43 10 <sup>-5</sup> | 2.77 10 <sup>-5</sup>  | 1.42 10 <sup>-5</sup> | 2.04 10 <sup>-4</sup> | 6.25 10 <sup>-6</sup>  | 7.43 10 <sup>-6</sup>  |
|       |                   | 3.04 10 <sup>-4</sup> | 3.01 10 <sup>-4</sup> | 2.81 10 <sup>-4</sup> | 2.52 10 <sup>-4</sup> | 1.77 10 <sup>-04</sup> | 2.46 10 <sup>-4</sup> | 3.98 10 <sup>-5</sup> | 2.88 10 <sup>-4</sup>  | 3.77 10 <sup>-4</sup>  |

**Table S11:** Emission data computed with ADF for S1 and T1 states of **1tBu**. E<sub>def</sub>, E<sub>em</sub>, E<sub>stab</sub>,  $\Delta E$  and  $\Delta E_{ST}$  are in eV,  $\lambda_{em}$  is in nm, SOC is in cm<sup>-1</sup>. 1) Values for the 2<sup>nd</sup> minima due to oscillation of the exciton for  $\gamma$ ,  $\epsilon$  and  $\zeta$ . Data are not given for  $\alpha$ ,  $\beta$  and  $\delta$  because the second minima is strictly identical to the first one due to symmetry.

|    | S1    | S2    | S3    | S4   | T1    | T2    | T3    | T4    |
|----|-------|-------|-------|------|-------|-------|-------|-------|
| T1 | 0.0   | 0.0   | 302.0 | 6.8  | 0.0   | 0.0   | 0.0   | 381.0 |
| T2 | 269.0 | 0.0   | 0.0   | 21.6 | 0.0   | 0.0   | 421.1 | 0.0   |
| T3 | 0.0   | 0.0   | 0.0   | 18.7 | 0.0   | 421.1 | 0.0   | 0.0   |
| T4 | 0.0   | 295.8 | 0.0   | 10.3 | 381.1 | 0.0   | 0.0   | 0.0   |

**Table S12:** Spin-orbit coupling (in cm<sup>-1</sup>) between the low-lying excited states in **1Me** computed with ADF.

|    | Structure                                                      | 2     | 2     | 3     | 3     |
|----|----------------------------------------------------------------|-------|-------|-------|-------|
| S1 | Cu-N                                                           | 2.017 | 2.271 | 1.989 | 2.200 |
|    | Cu-N                                                           | 2.017 | 2.271 | 1.996 | 2.209 |
|    | Cu-N                                                           | 2.254 | 2.017 | 2.122 | 1.980 |
|    | Cu-N                                                           | 2.254 | 2.017 | 2.364 | 1.999 |
|    | Cu-X <sub>1</sub>                                              | 3.910 | 4.193 | 3.899 | 4.132 |
|    | Cu-X <sub>2</sub>                                              | 4.194 | 3.932 | 4.182 | 3.906 |
|    | X <sub>1</sub> -Cu-X <sub>2</sub>                              | 180.0 | 180.0 | 174.9 | 176.5 |
|    | C <sub>1</sub> -X <sub>1</sub> -X <sub>2</sub> -C <sub>2</sub> | 90.0  | 90.0  | 89.3  | 89.7  |
| T1 | Cu-N                                                           | 2.010 | 2.269 | 1.978 | 2.205 |
|    | Cu-N                                                           | 2.010 | 2.269 | 1.995 | 2.193 |
|    | Cu-N                                                           | 2.250 | 2.011 | 2.120 | 1.973 |
|    | Cu-N                                                           | 2.250 | 2.011 | 2.354 | 1.988 |
|    | Cu-X <sub>1</sub>                                              | 3.908 | 4.192 | 3.899 | 4.125 |
|    | Cu-X <sub>2</sub>                                              | 4.189 | 3.933 | 4.177 | 3.903 |
|    | X <sub>1</sub> -Cu-X <sub>2</sub>                              | 180.0 | 180.0 | 175.1 | 176.5 |
|    | C <sub>1</sub> -X <sub>1</sub> -X <sub>2</sub> -C <sub>2</sub> | 90.0  | 89.7  | 88.9  | 89.8  |

**Table S13:** Computed S1 and T1 (ADF) geometrical parameters. Distances are in Angstroms, angles and dihedral angles in degrees.

<sup>1</sup> Wang, R.Z.; Xu, J.Q.; Yang, G.Y.; Bu, W.M.; Xing, Y.H.; Li, D.M.; Liu, S.Q.; Ye, L.; Fan, Y.G. Structure of [Cu(phen)<sub>2</sub>][Cu(phen)]<sub>2</sub>Mo<sub>8</sub>O<sub>26</sub>·H<sub>2</sub>O. *Pol. J. Chem.* **1999**, *73*, 1909.

<sup>2</sup> Avdeeva, V.V.; Dziova, A.E.; Polyakova, I.N.; Malinina, E.A.; Goeva, L.V.; Kuznetsov, N.T. Copper(I), copper(II), and heterovalent copper(I,II) complexes with 1,10-phenanthroline and the closo-decaborate anion. *Inorg. Chim. Acta* **2015**, *430*, 74–81

<sup>3</sup> Rheingold, A.L. (Department of Chemistry, University of California, La Jolla, CA, USA); Maatta, E. (Department of Chemistry, Kansas State University, Manhattan, KS, USA) CSD Communication, 2015.

<sup>4</sup> Huang, Z.; Hartwig, J.F. Copper(I) Enolate complexes in  $\alpha$ -Arylation Reactions: Synthesis, Reactivity and Mechanism. *Angew. Chem. Int. Ed.* **2012**, *51*, 1028–1032.

<sup>5</sup> Lin, X.; Hou, C.; Li, H.; Weng, Z. Decarboxylative Trifluoromethylating Reagent [Cu(O<sub>2</sub>CCF<sub>3</sub>)(phen)] and Difluorocarbene Precursor [Cu(phen)<sub>2</sub>][O<sub>2</sub>CCF<sub>2</sub>Cl]. *Chem. Eur. J.* **2016**, *22*, 2075–2084.

<sup>6</sup> Hillhouse, G. (Searle Chemistry Laboratory, Department of Chemistry, The University of Chicago, Chicago, IL, USA); Rheingold, A.L. (Department of Chemistry, University of Delaware, Newark, DE, USA); Allen, M.B. CSD Communication, 1996

<sup>7</sup> Huang, Y.; Ajitha, M.J.; Huang, K.-W.; Zhang, Z.; Weng, Z. A class of effective decarboxylative perfluoroalkylating reagents: [(phen)<sub>2</sub>Cu](O<sub>2</sub>CRF) *Dalton Trans.* **2016**, *45*, 8468–8474

<sup>8</sup> Yu, J.-H.; Lu, Z.-L.; Xu, J.-Q.; Bie, H.-Y.; Lu, J.; Zhang, X. Syntheses, characterization and optical properties of some copper(i) halides with 1,10-phenanthroline ligand, *New J. Chem.* **2004**, *28*, 940–945

- 
- <sup>9</sup> Hamalainen, R. (Department of Inorganic Chemistry, University of Helsinki, Helsinki, Finland); Ahlgren, M. (Department of Inorganic Chemistry, University of Helsinki, Helsinki, Finland); Turpeinen, U. (Department of Inorganic Chemistry, University of Helsinki, Helsinki, Finland); Raikas, T. (Department of Inorganic Chemistry, University of Helsinki, Helsinki, Finland). *Crystal Structure Communications*. 1979.
- <sup>10</sup> Dessy, G. (Laboratorio di Teoria e Struttura Elettronica e Comportamento Spettrochimico dei Composti di Coordinazione del CNR, Monterotondo Stazione, Italy); Fares, V. (Laboratorio di Teoria e Struttura Elettronica e Comportamento Spettrochimico dei Composti di Coordinazione del CNR, Monterotondo Stazione, Italy). *Crystal Structure Communications*, 1979.
- <sup>11</sup> Royappa, A.T.; Royappa, A.D.; Moral, R.F.; Rheingold, A.L.; Papoular, R.J.; Blum, D.M.; Duong, T.Q.; Stepherson, J.R.; Vu, O.D.; Chen, B.; Suchomel, M.R.; et al. Copper(I) oxalate complexes: Synthesis, structures and surprises *Polyhedron*, **2016**, *119*, 563-574.
- <sup>12</sup> Zheng, S.-L.; Gembicky, M.; Messerschmidt, M.; Dominiak, P.M.; Coppens, P. Effect of the Environment on Molecular Properties: Synthesis, Structure, and Photoluminescence of Cu(I) Bis(2,9-dimethyl-1,10-phenanthroline) Nanoclusters in Eight Different Supramolecular Frameworks. *Inorg. Chem.* **2006**, *45*, 9281-9289
- <sup>13</sup> Kovalevsky, A. Y.; Gembicky, M.; Novozhilova, I. V.; Coppens, P. Solid-State Structure Dependence of the Molecular Distortion and Spectroscopic Properties of the Cu(I) Bis(2,9-dimethyl-1,10-phenanthroline) Ion. *Inorg. Chem.* **2003**, *42*, 8794-8802
- <sup>14</sup> Blake, A.J.; Hill, S.J.; Hubberstey, P.; Li, W.-S. Copper(I) chelated by 2,9-dimethyl-1,10-phenanthroline and bridged by 4,4'-bipyridine or trans-1,2-bis(pyridin-4-yl)ethene to give discrete dinuclear and polymeric cations. *J. Chem. Soc. Dalton Trans.* **1998**, 909-916
- <sup>15</sup> Gandhi, B.A.; Green, O.; Burstyn, J.N. Facile oxidation-based of sterically encumbered four-coordinate bis(2,9-di-*ter*-butyl-1,10-phenanthroline)copper(I) and related three-coordinate copper(I) complexes. *Inorg. Chem.* **2007**, *46*, 3816-3825.
